# Supplementary material
Source: PubMed Central journal article supplement (PMC4937502)
Supplement: 10.1074_M115.056580_mcp.M115.056580-4.pdf [file 10.1074_M115.056580_mcp.M115.056580-4.pdf]

● AD 1  
● AD 2  
● Control



DLG1.ALF  
 EAAT1.DVE  
 CTNND1.SGG  
 ANK2.LIE  
 AF2A1.LVE  
 AF2A1.LIV  
 AF1B1.NIM  
 AF2A2.CYS  
 AF2B1.LAS  
 AF2A1.THI  
 AF2A2.EMA  
 AF2A2.LTE  
 SV2A.WFS  
 SYM1.SLK  
 SYM1.TYA  
 DFYS2.GLY.x  
 DFYS2.GSE.x  
 FAK1.LTD  
 FAK1.MSD  
 STP1.DPO  
 UBR4.ITV  
 SEPT9.STL  
 CAME2B.PFF.x  
 FRKCA.LTD.x  
 STCBP1.ADD.x  
 STCBP1.AAD.x  
 STCBP1.LAE.x  
 MAFT.IGS  
 MAFT.LGT  
 HSPA5.MEL  
 HSPA5.SQI  
 GNAZ.LLL  
 APO1.SIV.y  
 DLG2.VNE  
 HSP90A.HFD  
 MAP1A.VIF  
 MAP2.IVO  
 MAP2.DLA  
 MAP2.MFT  
 MAP2.LIN  
 ACOL.LTG  
 USP9.IFO  
 SYMGA1.VIQ  
 EFPLA1.STT  
 KALP1.LAQ  
 HSPA2.ALE  
 CNTN1.IIA  
 GRIN1.TOG  
 OGDH.FGL  
 SYM1.VLL  
 GR1A1.YTS  
 GR1A3.TPV  
 VPS35.LML  
 FCDH1.VIV  
 RAB14.TGE  
 GRAP2.IFA  
 CASK.VGD  
 ROCK1.DVE  
 CACNA2D1.IKP  
 FRAP1.DAS  
 SYT1.LTV  
 GRIN2A.FSY  
 MDUF54.FAY  
 ATP6V1B2.VFM  
 ATP9V1A.TVI  
 ITPR1.ATV  
 NRCN2.AIV  
 CLTC.EAI  
 CLTC.BIQ  
 DMN1.MIV  
 GR1A1.FEG  
 GRM2.IEG  
 GAD1.LTD  
 GRIN2B.OVD  
 GRIN1.AIT  
 HOMER1.HWE  
 BSM.ELO  
 DLG4.AMD  
 DLG4.MTY  
 GKAP1.ATO  
 GKAP3.EAE  
 HOMER1.IYA  
 SHANK3.VGI  
 HK1.TTV  
 GR1A2.GLS  
 GRM2.3.LFO  
 GABBR1.DIL  
 GR1A3.GSA  
 GR1A2.OVO  
 GR1A2.LNE  
 GR1A4.QTE  
 GR1A4.GSS  
 GRIN1.VIQ  
 F14CA.DFL  
 ATP6V0A1.LTF  
 ATP6V0A1.EIM  
 ATP6V0A1.MFL  
 NRCN1.3.MII  
 SEPT3.STL  
 SEPT3.VVN  
 SEPT3.FSA  
 SYT1.TIN  
 SV2A.AAP  
 GRIN2B.LVI  
 RAB24.LEP  
 ITPR1.SIP  
 SLC4A4.FLF  
 CADPS.DIV  
 ACOL.VAG  
 ATP1A1.AVF  
 ATP1A1.EQP  
 ATP1A1.IVE  
 ATP1A2.OTA  
 ATP1A2.FDT  
 ATP1A2.VAE  
 ATP1A3.CIE  
 ATP1A3.GGO  
 GLUD1.CAV  
 SYM1.LYA  
 SYM1.VSE  
 GLUL.TCL  
 HSP60.GTI  
 HSP60.LSD  
 HSP60.MAG  
 IDH3A.MTY  
 ATP5A1.TSI  
 ATP5A.VVD  
 MHR2.GYL  
 ATP1B1.AYG  
 ATP1B1.FTH  
 SLC25A5.DFL  
 MDUF44.FYS  
 MDUF45.VTE  
 MDUF10.VVE  
 MDUF71.GGA  
 AF1B1.IGL  
 AF1B1.VVD  
 AF1B1.HAL  
 ATP9.YAT  
 CS.AIG  
 DLST.LGF  
 MDH1.FYF  
 MDH1.VNV  
 MDH2.IQE  
 MHR2.TII  
 VDAC1.GYG  
 VDAC2.GFG  
 VDAC2.LTL  
 VDAC2.YOL  
 VDAC3.LSQ  
 PFB.AAI  
 PFB.VLP  
 PFB2.IVQ  
 PFB2.VLP  
 SUCCL1.IIC  
 SUCCL1.LIG  
 SDHB.DIV  
 SLC25A11.AVV  
 SLC25A11.LTG  
 PDHB.VFL  
 STT7.AMD  
 RAB3A.TTS  
 RAB3A.ILI  
 STP1.LVD  
 SLC25A3.PGF  
 SLC25A3.FVV  
 SLC25A5.YFP  
 SLC25A22.GAA  
 MDUF54.GWN  
 CAME2B.PFF.y  
 VPR2.AFA  
 DMN1.DHL  
 ANK1.LGY  
 ANK2.LGY  
 AF2A2.LON  
 ATP2A2.TDQ  
 NSF.GSI  
 NSF.IPD  
 NSF.VLD  
 NSF.VVM  
 STCBP1.ADD.y  
 STCBP1.LAE.y  
 FRKCG.GSD  
 FRKCG.APV  
 FRKCG.BOS  
 MCDN.MDS  
 FC.GAN  
 KCTD12.FNF  
 ADD1.SIV.x  
 ADD2.GYS  
 ADD2.VMI  
 SECC2B.DLQ  
 SECC2B.GEA  
 FLOT1.ISL  
 FLOT2.MAL  
 CACNA2D1.AKL  
 CAME2D.PFF  
 CAME2A.VTE  
 CAME2A.PTE  
 CAME2A.VLA  
 FSN1.LVS  
 CALB3.LIF  
 HPCA.IYA  
 YWHAM.OAF  
 SEPT11.AAA  
 PFF3CA.GLT  
 PFF3CB.LTQ  
 GLUD1.TBA  
 GLUD1.YST  
 ATP6V1B2.AVV  
 ARF1.DAV  
 ARF1.ILM  
 RAB10.LLL  
 RAB1A.EFA  
 GMA11.TTG  
 GNA.LLI  
 GNB1.LFY  
 GNB1.LTI  
 GNB1.LIV  
 YWHAM.AAF  
 YWHAM.EAA  
 YWHAM.VTE  
 SEPT4.VMI  
 YWHAM.GIV  
 YWHAM.DIC  
 YWHAM.YLA  
 FRKCA.LIQ  
 CDC42.NVF  
 SNAP25.MIQ  
 VGLUT3.VTE  
 STX1B.LAI  
 VAMP2.ADA  
 RAB2A.EHG  
 PFF1CA.LLE  
 CKB.LGF  
 CKB.NTI  
 CKB.LEQ  
 CAME2G.ITE  
 FROX3.LIA  
 FTCE33.LTF  
 DFYS2.GLY.y  
 DFYS2.GSE.y  
 HSPA4.AFS  
 HSPA4.SHL  
 HSPA2.LIN  
 SYM2.QLI  
 ANK1.LFY  
 FDX.LFF  
 CMP.AQG  
 CMP.NOV  
 VIM.EVQ  
 EMO2.GMP  
 ENO2.LGA  
 TP11.VVL  
 PFF1R7.AIE  
 DCTN1.AEI  
 UBA1.ATL  
 PFF2R3B.VVI  
 GABR1.LIP  
 PPIA.FED  
 PRDX1.LVQ  
 PRDX1.ATA  
 PRDX1.TIA  
 SEPT2.ASI  
 GNAO.VSA  
 AF2M1.ASE  
 TUBB1.BES  
 TUBB.NAA  
 CDC42.CVV  
 CDC42.TCL  
 PALA.VIM  
 RHOB.IGA  
 RAC1.LVI  
 RHOA.LVI  
 RHOA.IGA  
 RHOA.TCL  
 RHOB.TCL  
 YWHAM.SIC  
 YWHAM.LLI  
 RHOA.HFC  
 PFF2R3B.NAA  
 SCLK2.LVN  
 SPCIN1.OLG  
 USP5.FIT  
 GUB1.MTT  
 FRKCA.STL  
 FRKCA.LTD.y  
 FRKCA.LAD  
 NCAM1.LPS  
 NCAM1.TIE  
 SPTAL.TAT  
 SPTAL.LAA  
 SPTB.VIG  
 SPTB.EIG  
 SPTB.TOI  
 FFA1.VIG  
 ECN44.FYQ  
 PFF1CA.TPT  
 PFF1CA.FLD  
 CDK5.DIL  
 CDK5.SFL  
 LDBA.SAD  
 PFP2A.LTU  
 TUBB.LMT  
 PFF2B.GLS  
 TUBB.LAP  
 VSNL1.LML  
 VSNL1.STE  
 VSNL1.LNW  
 VSNL1.VEM  
 VSNL1.SDF  
 RTN4.AYL  
 RTN4.HQA  
 RTN4.GVI  
 RTN4.LFL  
 UCHL1.FSA
